# Supplementary material for: Usefulness of a Multiparent Advanced Generation Intercross Population With a Greatly Reduced Mating Design for Genetic Studies in Winter Wheat
Source: PubMed Central journal article supplement (PMC6291512; doi:10.3389/fpls.2018.01825), 2018-12-06
Supplement: Data_Sheet_8.pdf [file Data_Sheet_8.pdf]

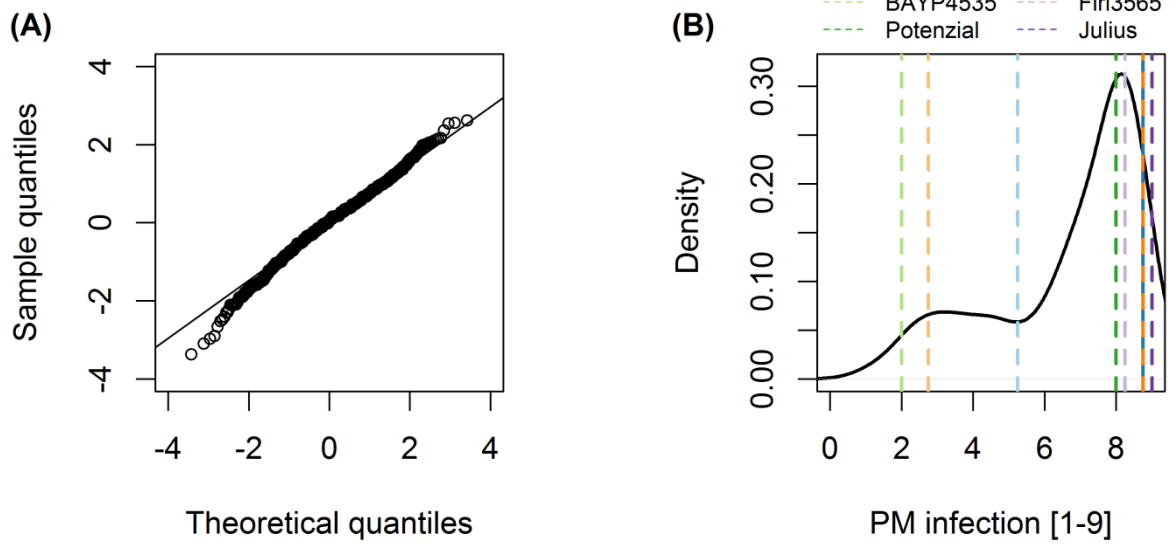

**Figure S8:** (A) normal QQ plot and (B) distribution of the adjusted means of powdery mildew infection. Vertical dotted lines (B) indicate the values of the parental lines.
