# Supplementary material for: Usefulness of a Multiparent Advanced Generation Intercross Population With a Greatly Reduced Mating Design for Genetic Studies in Winter Wheat
Source: Front Plant Sci. 2018 Dec 6;9:1825. doi: 10.3389/fpls.2018.01825 (PMC6291512; doi:10.3389/fpls.2018.01825)
Supplement: Supplementary file 11 [file Table_3.XLSX]

## Sheet: Tabelle1
Table S3: Adjusted means for seedling resistance to powdery mildew.
line	PM
BMW 2001	6.75
BMW 2002	7.5
BMW 2003	2.5
BMW 2004	8.75
BMW 2005	6.5
BMW 2006	7.75
BMW 2007	8.75
BMW 2008	8.5
BMW 2009	3.5
BMW 2012	8.25
BMW 2013	8.75
BMW 2015	8
BMW 2018	3.75
BMW 2020	3.5
BMW 2022	4.5
BMW 2023	9
BMW 2024	8.75
BMW 2025	8.25
BMW 2026	7.5
BMW 2027	4.75
BMW 2028	9
BMW 2029	8.25
BMW 2030	7.75
BMW 2031	5.75
BMW 2032	8.75
BMW 2033	6.75
BMW 2034	5.25
BMW 2036	8.75
BMW 2037	8
BMW 2038	8.5
BMW 2039	6.75
BMW 2041	8.75
BMW 2042	7.25
BMW 2043	8
BMW 2044	8.01
BMW 2045	8.25
BMW 2046	8.75
BMW 2047	7.75
BMW 2048	7.75
BMW 2050	8.5
BMW 2051	2.5
BMW 2052	8.25
BMW 2054	8.5
BMW 2055	8.75
BMW 2056	8.5
BMW 2058	3.65
BMW 2059	1
BMW 2060	7.25
BMW 2061	7.25
BMW 2062	9
BMW 2063	4
BMW 2065	8
BMW 2066	6.75
BMW 2068	7.75
BMW 2069	6.75
BMW 2071	8.31
BMW 2073	5.25
BMW 2075	8.25
BMW 2077	5.75
BMW 2080	8.25
BMW 2081	7.25
BMW 2082	5.5
BMW 2083	7.75
BMW 2086	6.75
BMW 2087	2.25
BMW 2088	7.75
BMW 2089	8
BMW 2090	5.75
BMW 2091	7.25
BMW 2092	3.65
BMW 2093	8.25
BMW 2094	6.75
BMW 2095	8
BMW 2096	8
BMW 2097	6.75
BMW 2098	4.75
BMW 2099	6.75
BMW 2100	8.25
BMW 2106	2.25
BMW 2107	6.5
BMW 2108	6.75
BMW 2109	8.75
BMW 2111	8.25
BMW 2112	8
BMW 2113	8
BMW 2114	4.75
BMW 2116	8.25
BMW 2118	8.25
BMW 2119	6.75
BMW 2120	6.5
BMW 2121	7.75
BMW 2124	8.25
BMW 2125	8
BMW 2126	8.25
BMW 2127	7.5
BMW 2128	8.75
BMW 2129	6
BMW 2130	8.25
BMW 2131	3.75
BMW 2132	5.75
BMW 2133	8.75
BMW 2134	6.75
BMW 2135	8
BMW 2136	6.75
BMW 2137	8.25
BMW 2139	8
BMW 2140	8
BMW 2141	8.75
BMW 2142	8.75
BMW 2143	8.75
BMW 2144	4.75
BMW 2145	8.69
BMW 2146	6.25
BMW 2148	8
BMW 2151	8.75
BMW 2152	8
BMW 2153	4.5
BMW 2154	9
BMW 2155	6.5
BMW 2156	2.75
BMW 2157	8.25
BMW 2162	7.75
BMW 2163	9
BMW 2164	3.75
BMW 2165	8.25
BMW 2166	1.75
BMW 2167	8.75
BMW 2168	2.75
BMW 2170	3.24
BMW 2172	8.5
BMW 2173	4
BMW 2175	7.25
BMW 2176	8.5
BMW 2177	8.25
BMW 2178	7.75
BMW 2179	8.5
BMW 2180	8
BMW 2181	9
BMW 2182	5
BMW 2184	6.75
BMW 2186	8.25
BMW 2187	7.25
BMW 2188	8.75
BMW 2190	3.75
BMW 2191	6
BMW 2192	7
BMW 2193	1.25
BMW 2195	8.5
BMW 2196	8.25
BMW 2197	7.75
BMW 2198	8.25
BMW 2199	1.5
BMW 2200	3.75
BMW 2202	8.25
BMW 2203	8.5
BMW 2204	8.25
BMW 2205	8.5
BMW 2206	3
BMW 2207	7
BMW 2208	2.94
BMW 2209	3.5
BMW 2211	8.5
BMW 2212	6.75
BMW 2213	5.75
BMW 2215	4
BMW 2216	8
BMW 2217	7.25
BMW 2218	4.75
BMW 2219	2.75
BMW 2220	8
BMW 2222	2.25
BMW 2223	7.75
BMW 2224	2
BMW 2226	6
BMW 2227	3
BMW 2228	8
BMW 2229	9
BMW 2230	4
BMW 2231	9
BMW 2232	4.75
BMW 2233	9
BMW 2234	3.75
BMW 2236	7.5
BMW 2237	4.75
BMW 2238	6.25
BMW 2239	7.75
BMW 2240	7
BMW 2241	4.75
BMW 2242	3.25
BMW 2243	6.75
BMW 2244	8.25
BMW 2245	5
BMW 2246	3.5
BMW 2247	8.25
BMW 2248	8
BMW 2249	8.25
BMW 2250	7.75
BMW 2251	7.75
BMW 2252	4.25
BMW 2255	6
BMW 2256	7.5
BMW 2257	8
BMW 2258	2
BMW 2261	4.5
BMW 2262	5.5
BMW 2263	2.75
BMW 2264	7.25
BMW 2265	7
BMW 2266	6.25
BMW 2267	8
BMW 2268	7
BMW 2269	5.25
BMW 2270	8.75
BMW 2271	8
BMW 2272	8
BMW 2274	8
BMW 2275	8.25
BMW 2276	7.25
BMW 2277	7.5
BMW 2278	6.25
BMW 2279	5.5
BMW 2280	3.75
BMW 2281	7.25
BMW 2282	6.75
BMW 2283	8.5
BMW 2284	4.5
BMW 2285	9
BMW 2286	6.75
BMW 2287	4.75
BMW 2288	3.25
BMW 2289	8.75
BMW 2290	8.5
BMW 2291	4.75
BMW 2292	2.75
BMW 2293	7.75
BMW 2294	9
BMW 2295	4.75
BMW 2296	1.75
BMW 2297	8
BMW 2299	8.5
BMW 2300	7
BMW 2302	8.75
BMW 2304	8.5
BMW 2305	8.25
BMW 2306	8.75
BMW 2307	8
BMW 2309	8
BMW 2310	8.25
BMW 2311	5.75
BMW 2312	7
BMW 2314	8
BMW 2315	7.25
BMW 2320	8.25
BMW 2321	6
BMW 2322	4.25
BMW 2323	7
BMW 2324	1.25
BMW 2325	6.75
BMW 2326	3.25
BMW 2327	4
BMW 2328	8
BMW 2329	8.25
BMW 2330	6.25
BMW 2331	8.75
BMW 2332	6.75
BMW 2333	8.5
BMW 2334	3.05
BMW 2336	8.25
BMW 2337	7.25
BMW 2338	7.75
BMW 2340	6.25
BMW 2342	7.75
BMW 2344	7
BMW 2347	5.75
BMW 2348	7.75
BMW 2350	6.25
BMW 2351	7.75
BMW 2352	7.5
BMW 2353	6.75
BMW 2354	8.5
BMW 2355	8
BMW 2356	8.5
BMW 2358	8.62
BMW 2360	4
BMW 2361	7.25
BMW 2362	8.25
BMW 2363	5.75
BMW 2364	8
BMW 2365	7.5
BMW 2366	8.25
BMW 2367	7.5
BMW 2368	8.5
BMW 2369	2.25
BMW 2372	2.5
BMW 2373	8.75
BMW 2376	2.75
BMW 2377	4.25
BMW 2378	6.5
BMW 2384	9
BMW 2386	8
BMW 2387	6.5
BMW 2388	8.75
BMW 2392	6.75
BMW 2393	3.25
BMW 2394	3
BMW 2395	8
BMW 2396	8.25
BMW 2397	8.5
BMW 2398	8.25
BMW 2399	8
BMW 2401	7
BMW 2402	4.5
BMW 2406	1
BMW 2409	2.65
BMW 2410	8
BMW 2413	8.25
BMW 2414	7.25
BMW 2417	3
BMW 2418	8.75
BMW 2419	2
BMW 2421	7.25
BMW 2422	8
BMW 2423	8.25
BMW 2424	8.25
BMW 2425	8.25
BMW 2426	4.75
BMW 2427	7.75
BMW 2428	8
BMW 2429	8.5
BMW 2430	8.25
BMW 2432	8.25
BMW 2435	3.5
BMW 2437	8.25
BMW 2438	5.25
BMW 2439	7.5
BMW 2440	8.5
BMW 2441	9
BMW 2442	7.25
BMW 2443	8.75
BMW 2444	6
BMW 2445	7
BMW 2446	9
BMW 2447	7.75
BMW 2448	6.75
BMW 2449	6.25
BMW 2451	8.75
BMW 2452	7.5
BMW 2453	7.25
BMW 2454	8
BMW 2455	8
BMW 2456	8.75
BMW 2457	2.25
BMW 2458	4.5
BMW 2459	7.25
BMW 2461	6.25
BMW 2464	7
BMW 2465	7.25
BMW 2467	3.05
BMW 2468	3.5
BMW 2469	6.25
BMW 2470	7.75
BMW 2471	2
BMW 2472	6.75
BMW 2473	8
BMW 2474	7
BMW 2475	7
BMW 2476	8
BMW 2477	8.5
BMW 2478	9
BMW 2481	8.5
BMW 2483	2
BMW 2485	7.86
BMW 2489	7.5
BMW 2490	7.75
BMW 2492	3
BMW 2493	2.75
BMW 2494	8.5
BMW 2496	8.25
BMW 2497	7.25
BMW 2498	7.5
BMW 2503	4.75
BMW 2504	7.75
BMW 2505	2.5
BMW 2506	4.25
BMW 2507	8.25
BMW 2508	7
BMW 2509	8.25
BMW 2510	8.25
BMW 2511	2.25
BMW 2512	2.75
BMW 2513	7.75
BMW 2514	8.25
BMW 2515	2.25
BMW 2516	2.25
